# Supplementary material for: (E)-2-Benzylidenecyclanones: Part XVIII Study the Possible Link between Glutathione Reactivity and Cancer Cell Cytotoxic Effects of Some Cyclic Chalcone Analogs A Comparison of the Reactivity of the Open-Chain and the Seven-Membered Homologs
Source: MDPI journal article supplement (doi:10.3390/ijms24108557), 2023-05-10
Supplement: s1 [file s1]

## SUPPLEMENTARY MATERIALS

**Table S1.** Formula and exact mass (with abundance) of **IIb**, **IIc**, and the **IIb-GSH**, **IIb-NAC**, **IIc-GSH** and **IIc-NAC** adducts.\*

| Compound       | Formula                                                         | Exact mass<br>(a.m.u.) | Abundance<br>(%) |
|----------------|-----------------------------------------------------------------|------------------------|------------------|
| <b>IIb</b>     | C <sub>19</sub> H <sub>18</sub> O                               | 262.1358               | 80.71            |
| <b>IIc</b>     | C <sub>19</sub> H <sub>18</sub> O <sub>2</sub>                  | 278.1307               | 80.51            |
| <b>IIb-GSH</b> | C <sub>29</sub> H <sub>35</sub> N <sub>3</sub> O <sub>7</sub> S | 569.2196               | 66.81            |
| <b>IIb-NAC</b> | C <sub>29</sub> H <sub>35</sub> N <sub>3</sub> O <sub>8</sub> S | 585.2145               | 66.65            |
| <b>IIc-GSH</b> | C <sub>24</sub> H <sub>27</sub> NO <sub>4</sub> S               | 425.1661               | 71.71            |
| <b>IIc-NAC</b> | C <sub>24</sub> H <sub>27</sub> NO <sub>5</sub> S               | 441.1610               | 71.54            |

\*Calculated by the Scientific Instrument Services (SIS) calculator  
(<https://www.sisweb.com/referenc/tools/exactmass.htm>).

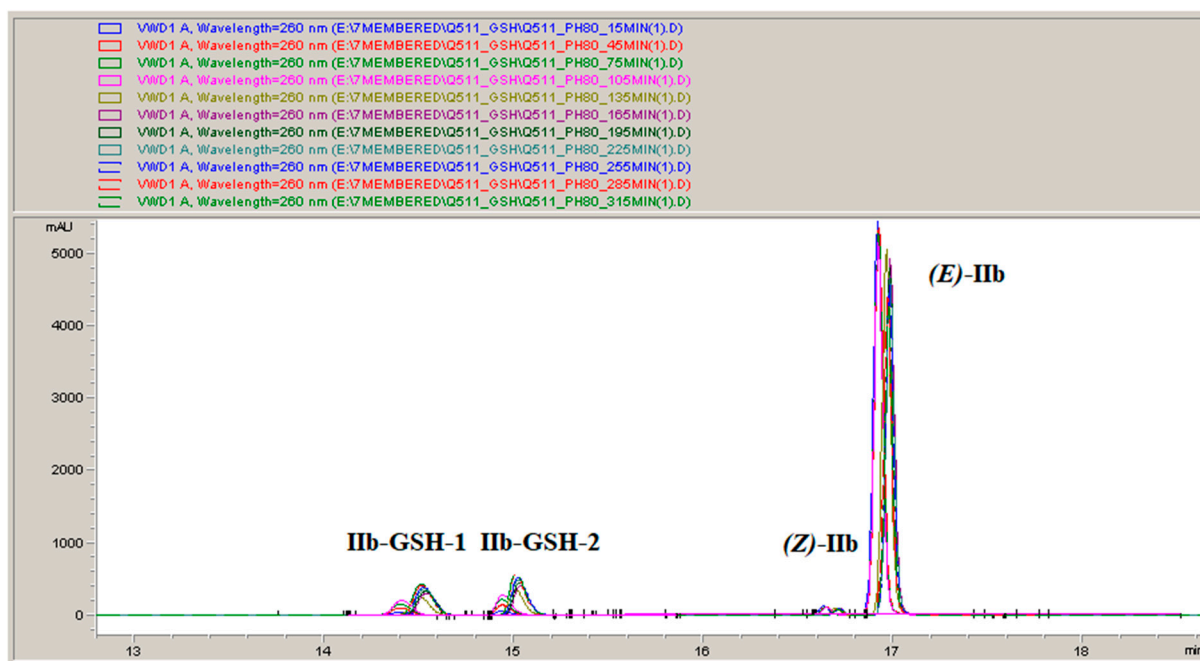

**Figure S1.** Overlaid HPLC-UV chromatograms of the 15, 45, 75, 105, 135, 165, 195, 225, 255, 285, and 315 min timepoint samples of the incubation mixture of **IIb** with GSH under pH 8.0/7.4 conditions.

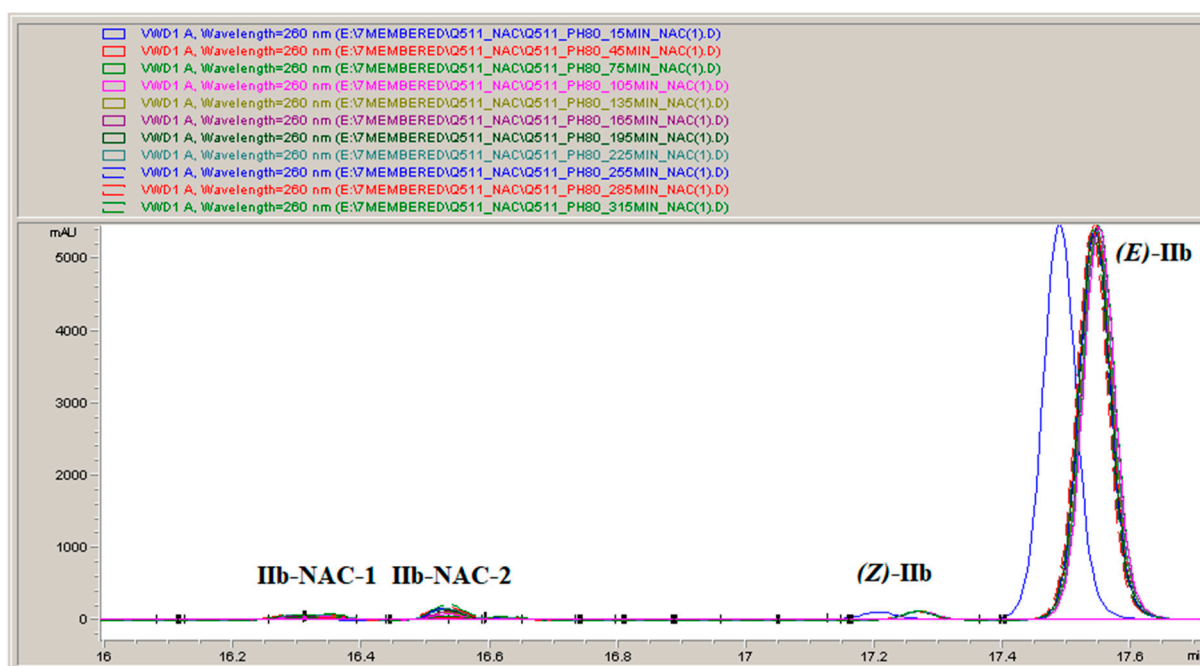

**Figure S2.** Overlaid HPLC-UV chromatograms of the 15, 45, 75, 105, 135, 165, 195, 225, 255, 285, and 315 min timepoint samples of the incubation mixture of **IIb** with NAC under pH 8.0/7.4 conditions. (The retention time of (Z)- and (E)-**IIb** in the 15 minute sample is shorter due to the improper conditioning of the HPLC column.)

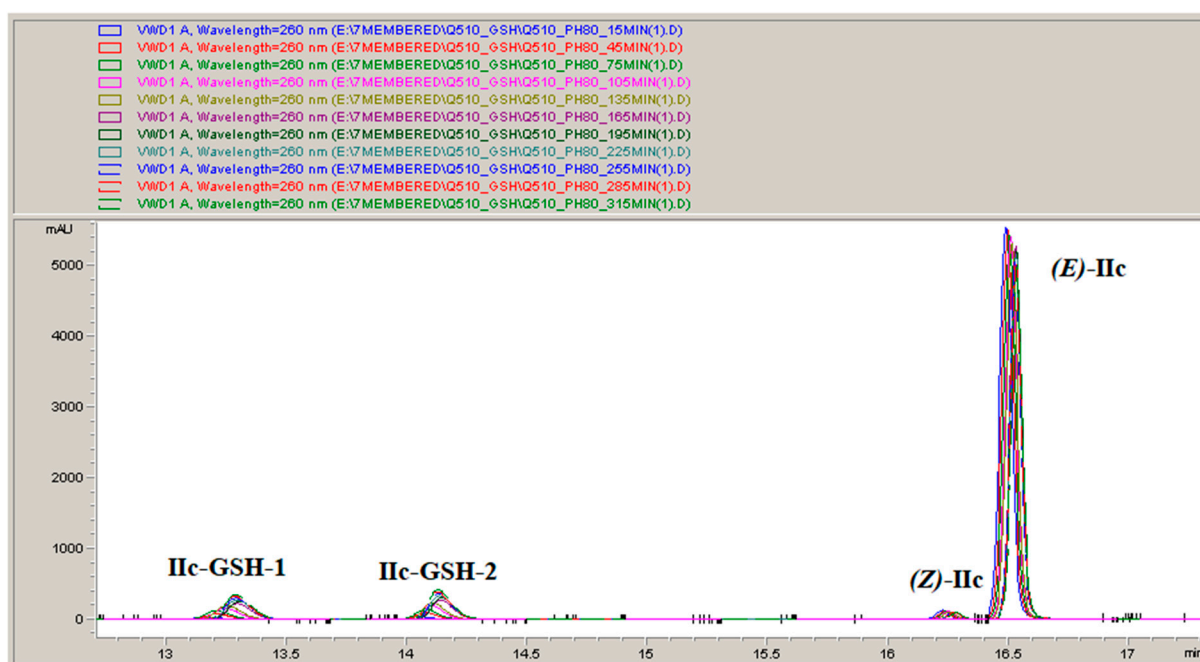

**Figure S3.** Overlaid HPLC-UV chromatograms of the 15, 45, 75, 105, 135, 165, 195, 225, 255, 285, and 315 min timepoint samples of the incubation mixture of **IIc** with GSH under pH 8.0/7.4 conditions.

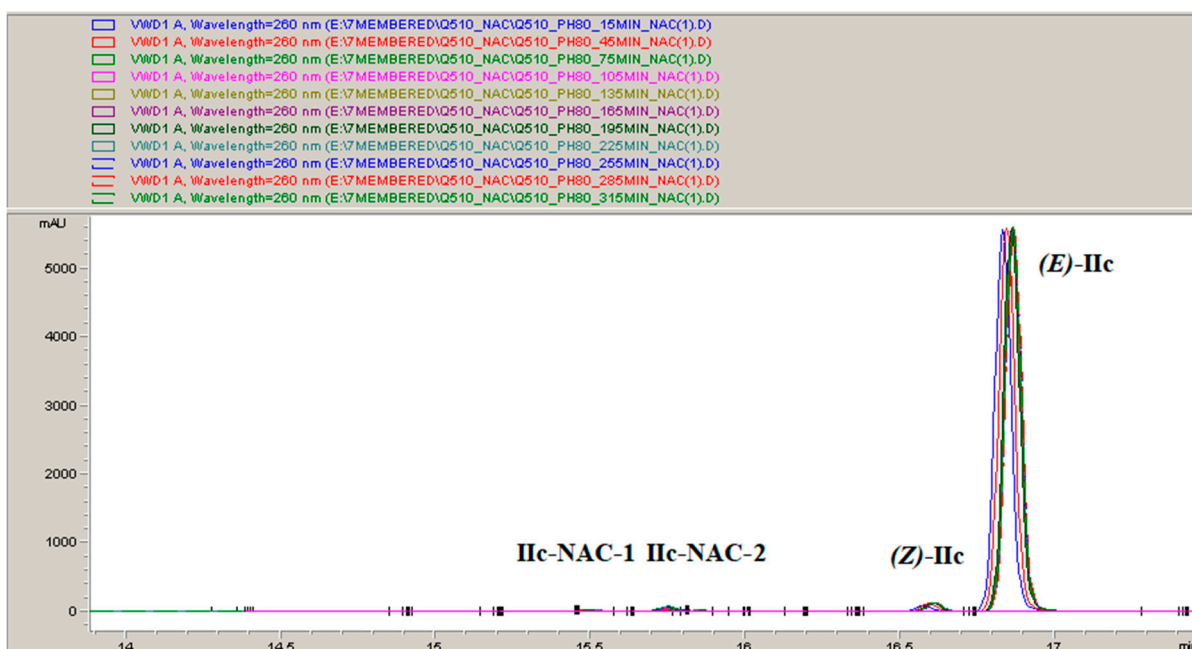

**Figure S4.** Overlaid HPLC-UV chromatograms of the 0, 15, 45, 75, 105, 135, 165, 195, 225, 255, 285, and 315 min timepoint samples of the incubation mixture of **IIc** with NAC under pH 8.0/7.4 conditions.

4c #2095 RT: 9.34 AV: 1 SB: 113 7.00-8.00 NL: 4.35E9  
T: FTMS + c ESI Full ms [70.0000-700.0000]

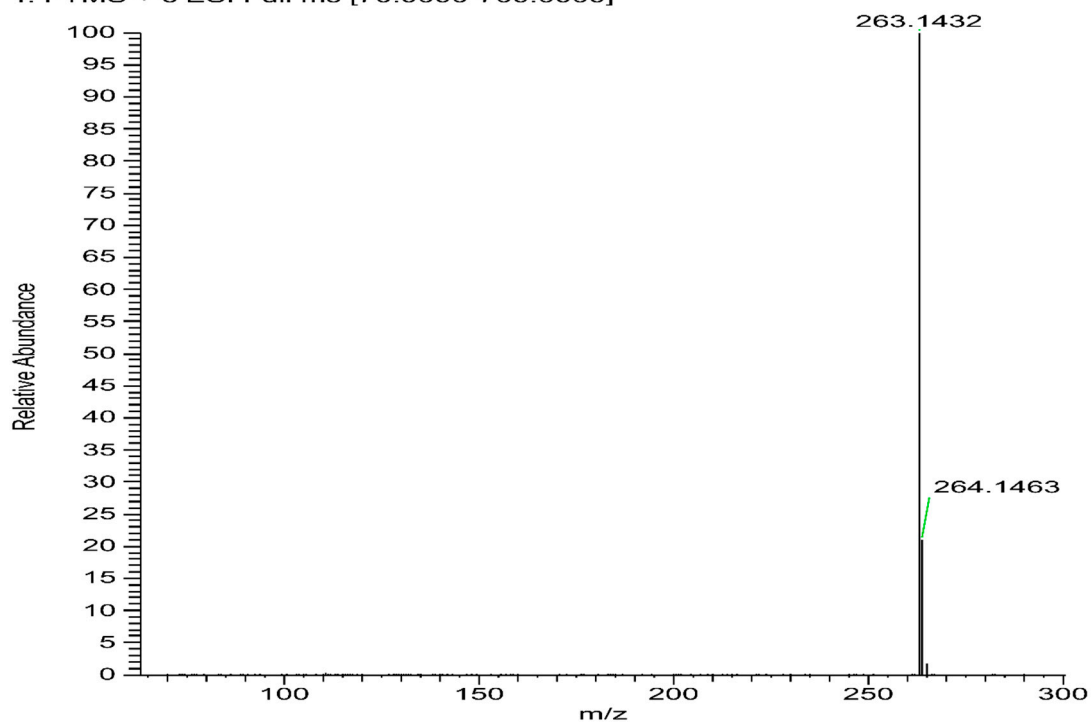

**Figure S5.** High-resolution, positive-mode HESI MS spectrum of **IIb**.

4d #1929 RT: 8.60 AV: 1 SB: 113 7.00-8.00 NL: 2.31E9  
T: FTMS + c ESI Full ms [70.0000-700.0000]

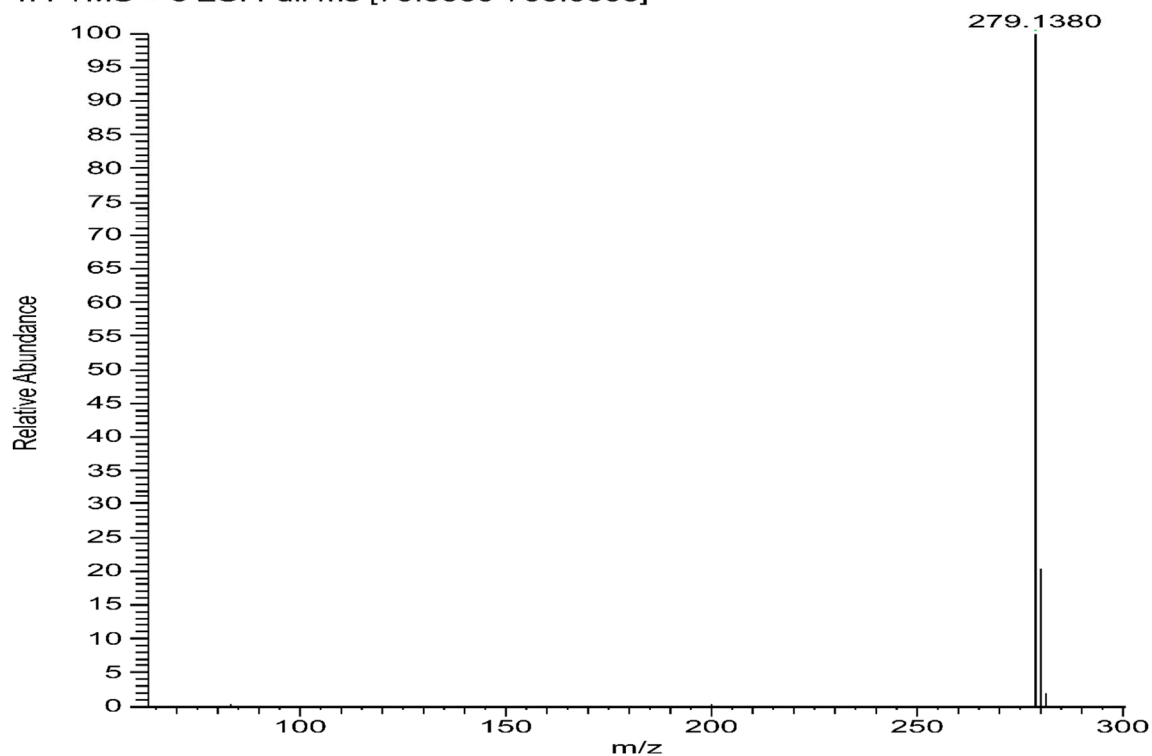

**Figure S6.** High-resolution, positive-mode HESI MS spectrum of **IIc**.

k5 #1467 RT: 11.14 AV: 1 SB: 67 9.00-10.00 NL: 7.86E7  
T: FTMS + c ESI Full ms [70.0000-1000.0000]

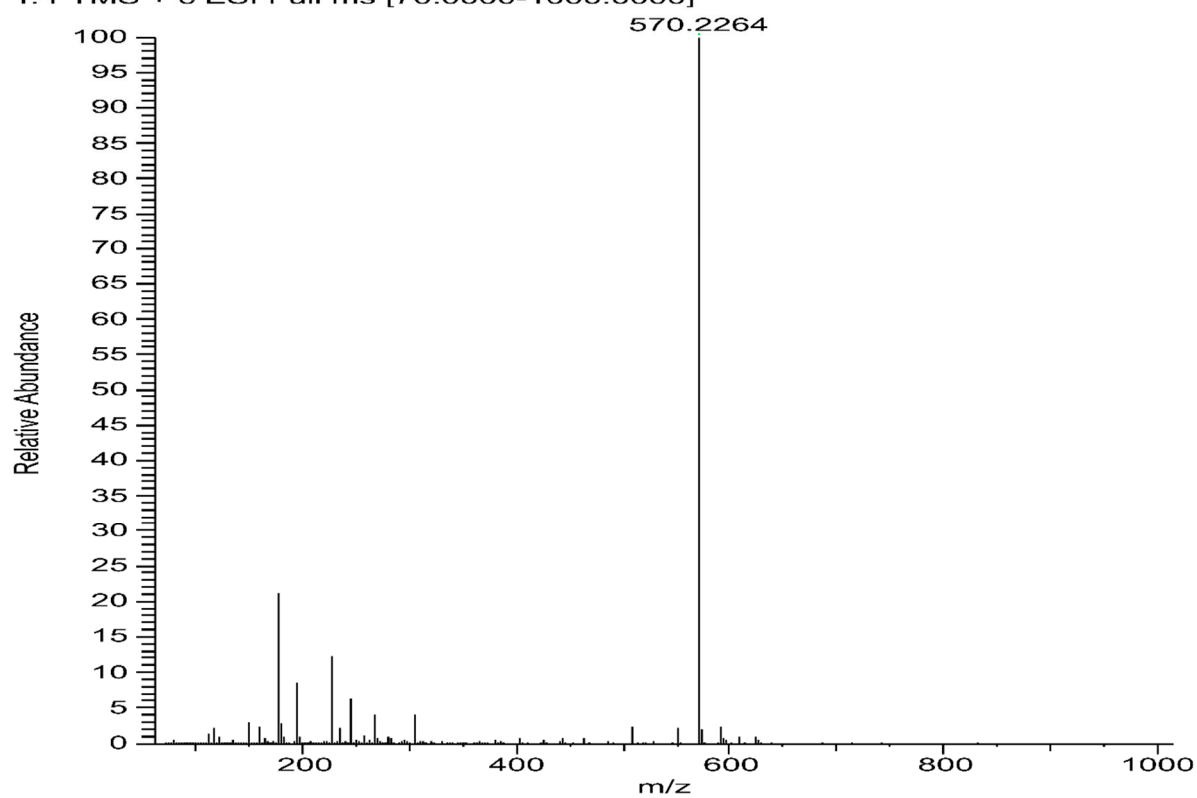

**Figure S7.** High-resolution, positive-mode HESI MS spectrum of **IIb-GSH** conjugate.

i4 #1562 RT: 12.44 AV: 1 SB: 66 11.00-12.00 NL: 1.13E8  
T: FTMS - c ESI Full ms [100.0000-1000.0000]

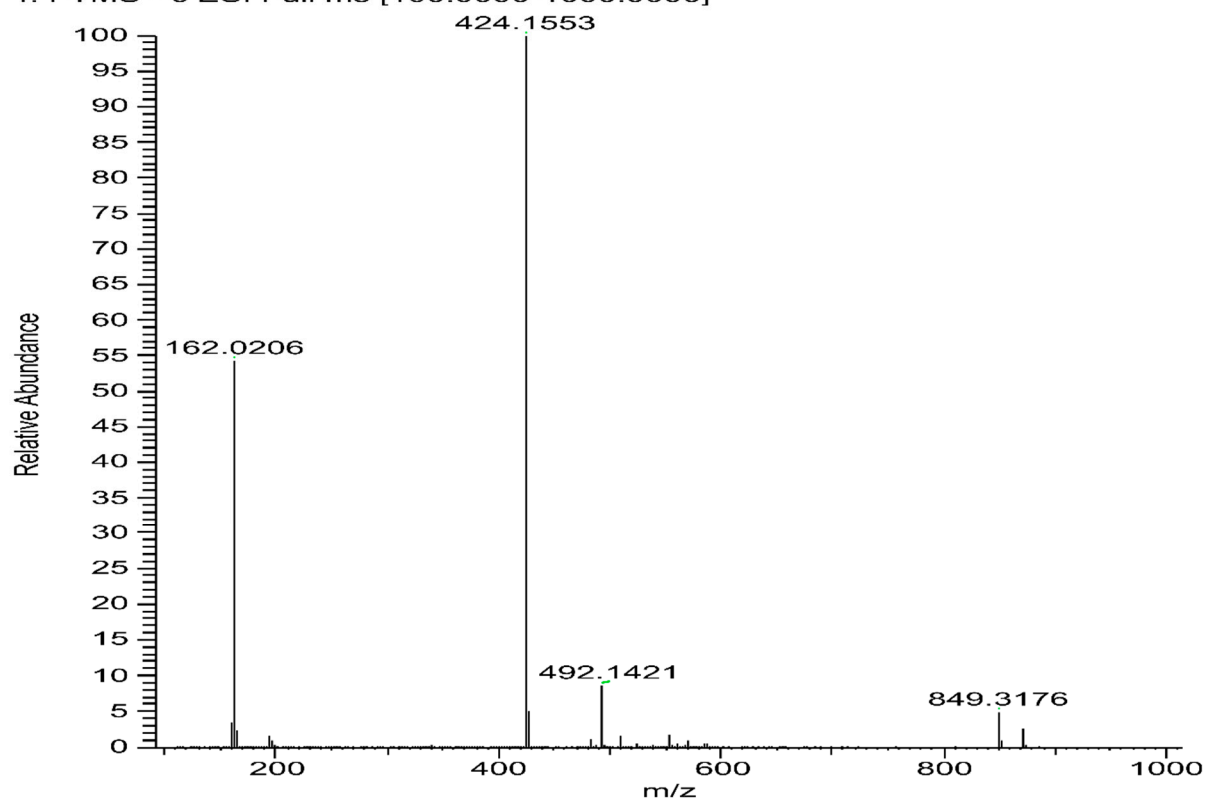

**Figure S8.** High-resolution, negative-mode HESI MS spectrum of **IIb**-NAC conjugate.

k4 #1435 RT: 10.89 AV: 1 SB: 66 9.00-10.00 NL: 5.23E7  
T: FTMS + c ESI Full ms [70.0000-1000.0000]

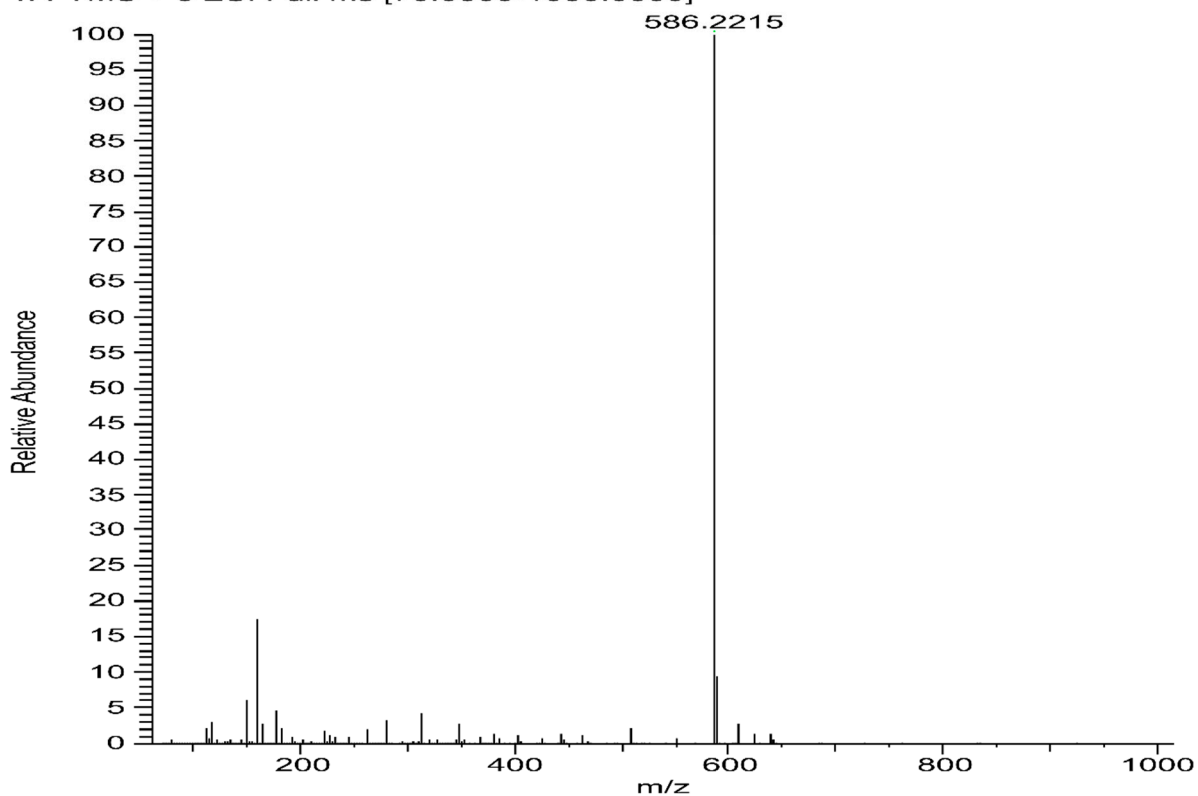

**Figure S9.** High-resolution, positive-mode HESI MS spectrum of **IIc**-GSH conjugate.

i7 #1472 RT: 11.75 AV: 1 SB: 66 10.00-11.00 NL: 1.33E8  
T: FTMS - c ESI Full ms [100.0000-1000.0000]

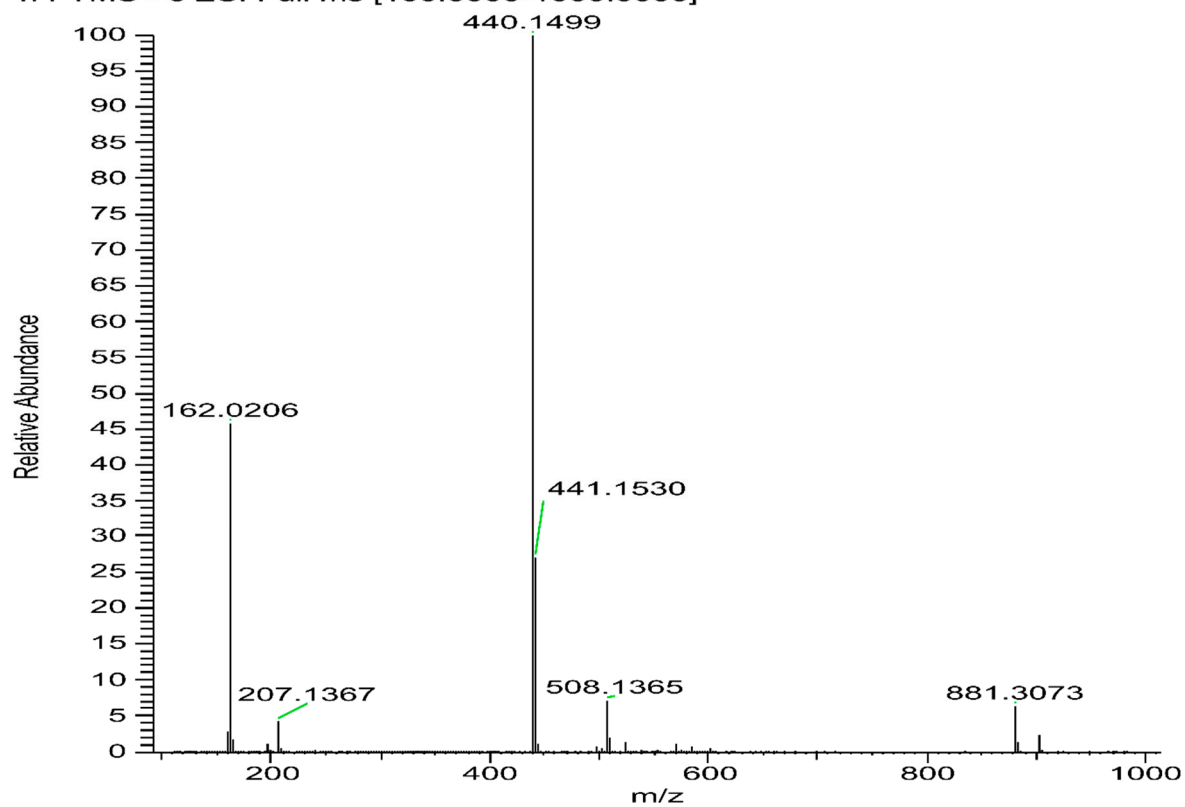

**Figure S10.** High-resolution, negative-mode HESI MS spectrum of **IIc**-NAC conjugate.



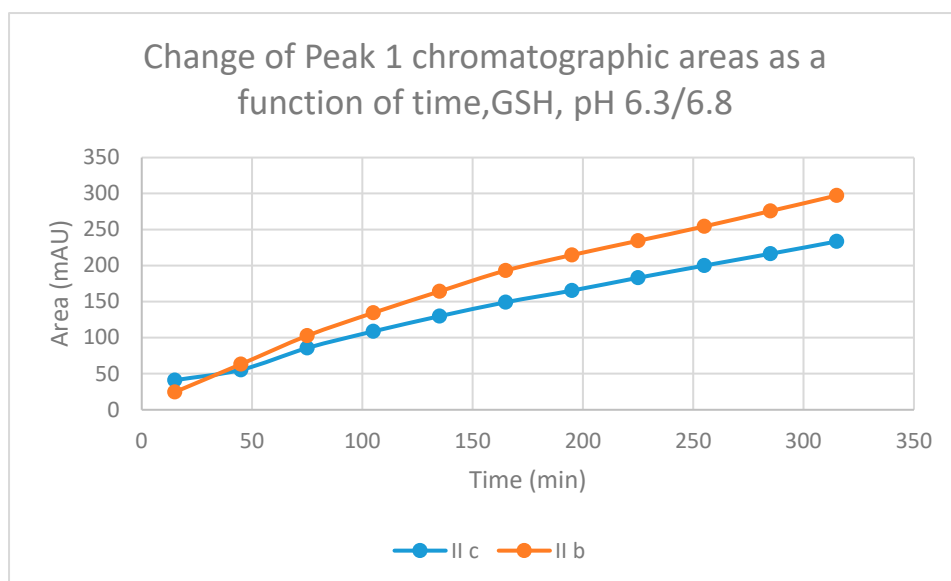

**Figure S11.** Change in the chromatographic peak area of adduct 1 of **II b** and **II c** in the chalcone–GSH incubations at pH 6.3/6.8.

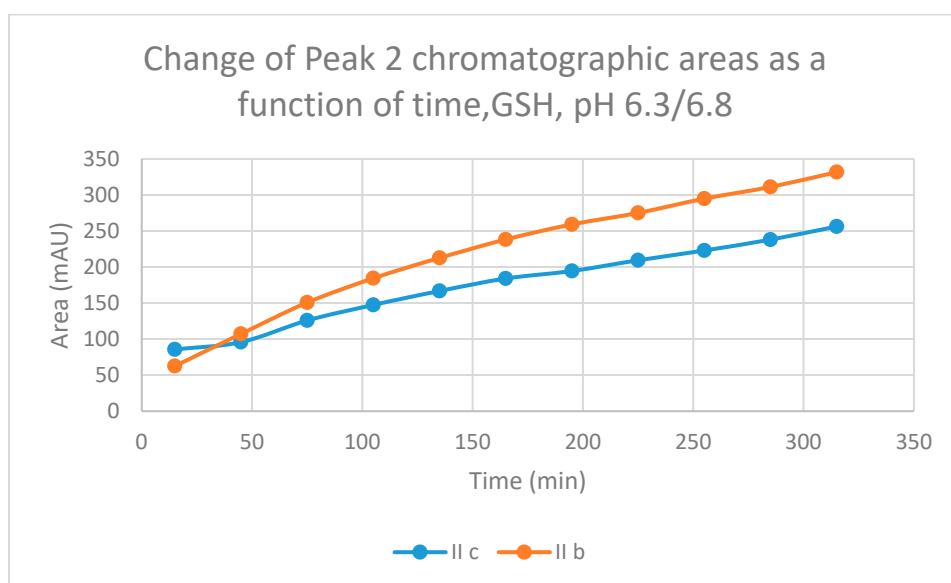

**Figure S12.** Change in the chromatographic peak area of adduct 2 of **II b** and **II c** in the chalcone–GSH incubations at pH 6.3/6.8.

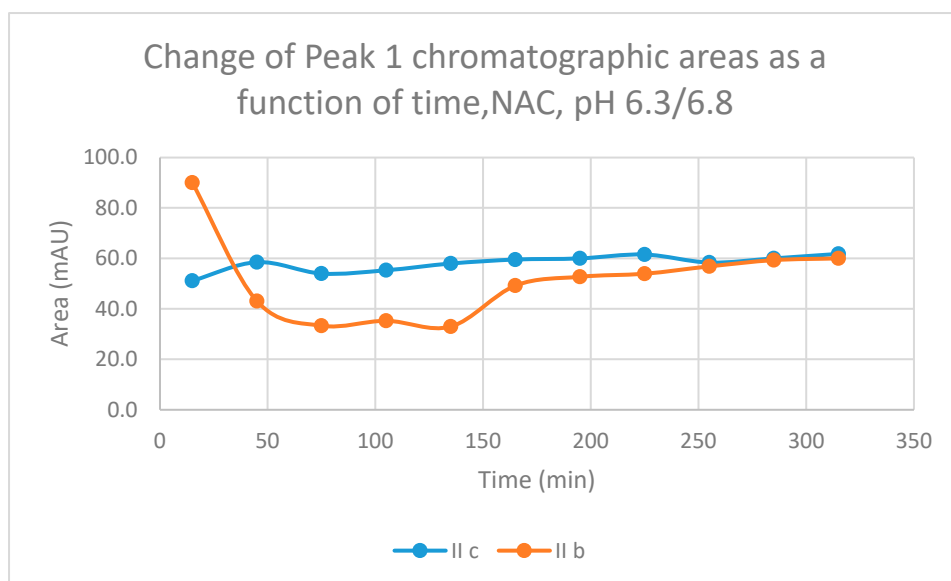

**Figure S13.** Change in the chromatographic peak area of adduct 1 of **IIb** and **IIc** in the chalcone–NAC incubations at pH 6.3/6.8.

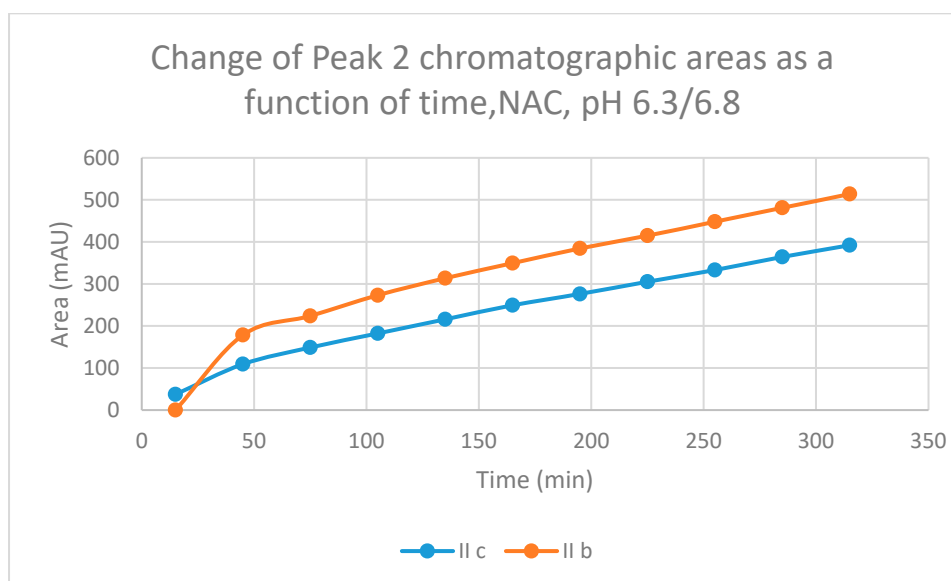

**Figure S14.** Change in the chromatographic peak area of adduct 2 of **IIb** and **IIc** in the chalcone–NAC incubations at pH 6.3/6.8.

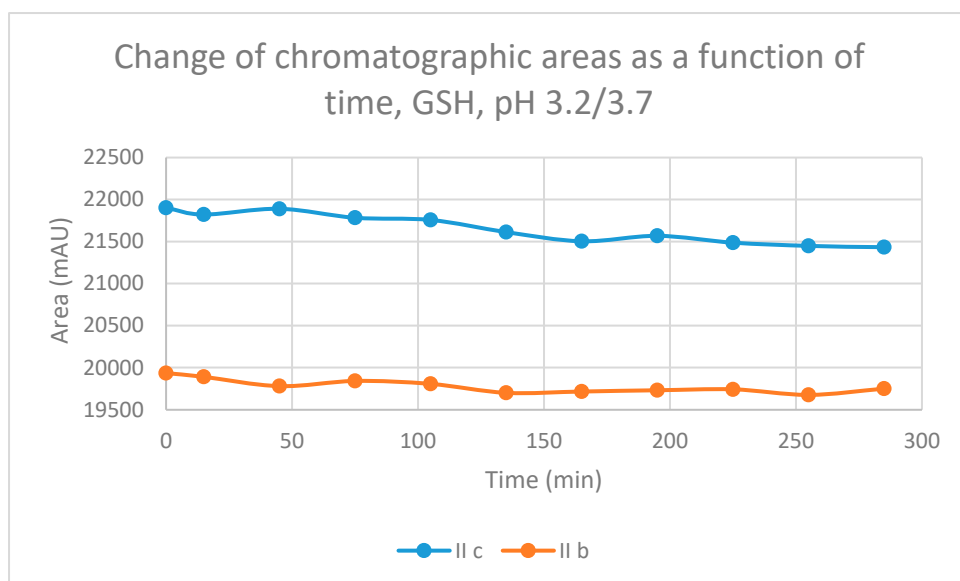

**Figure S15.** Change in the chromatographic peak area of **IIb** and **IIc** in the chalcone–GSH incubations at pH 3.2/3.7.

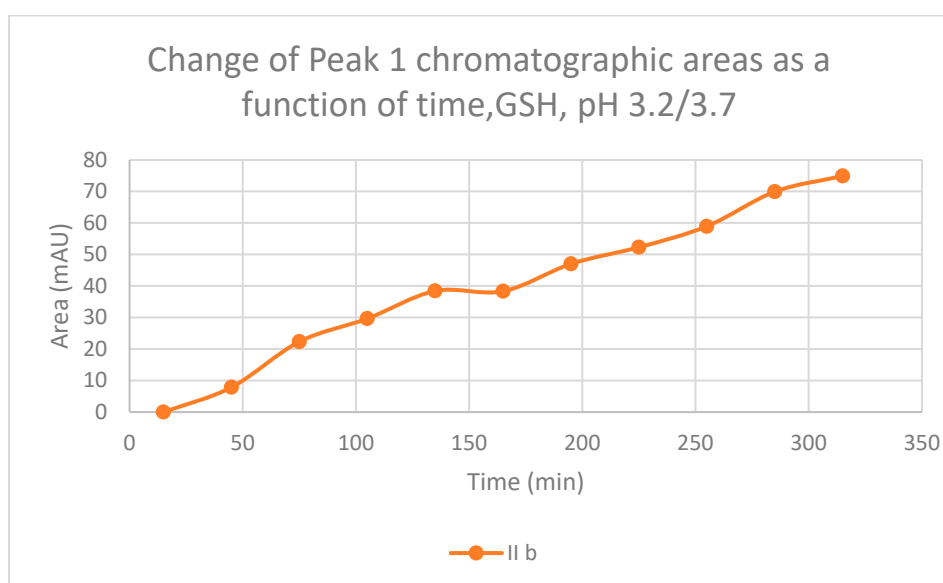

**Figure S16.** Change in the chromatographic peak area of adduct 1 of **IIb** in the chalcone–GSH incubations at pH 3.2/3.7.

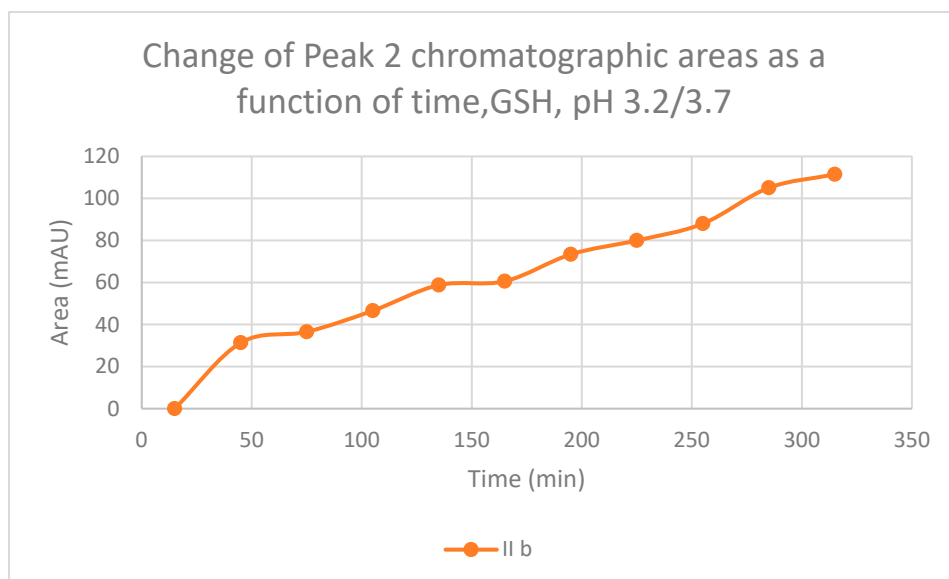

**Figure S17.** Change in the chromatographic peak area of adduct 2 of **IIb** in the chalcone–GSH incubations at pH 3.2/3.7.

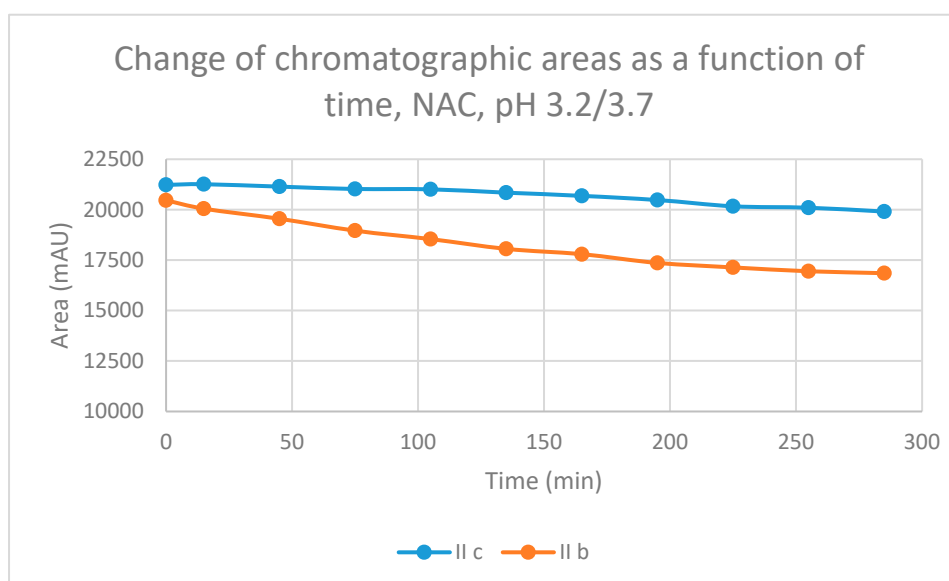

**Figure S18.** Change in the chromatographic peak area of **IIb** and **IIc** in the chalcone–NAC incubations at pH 3.2/3.7.

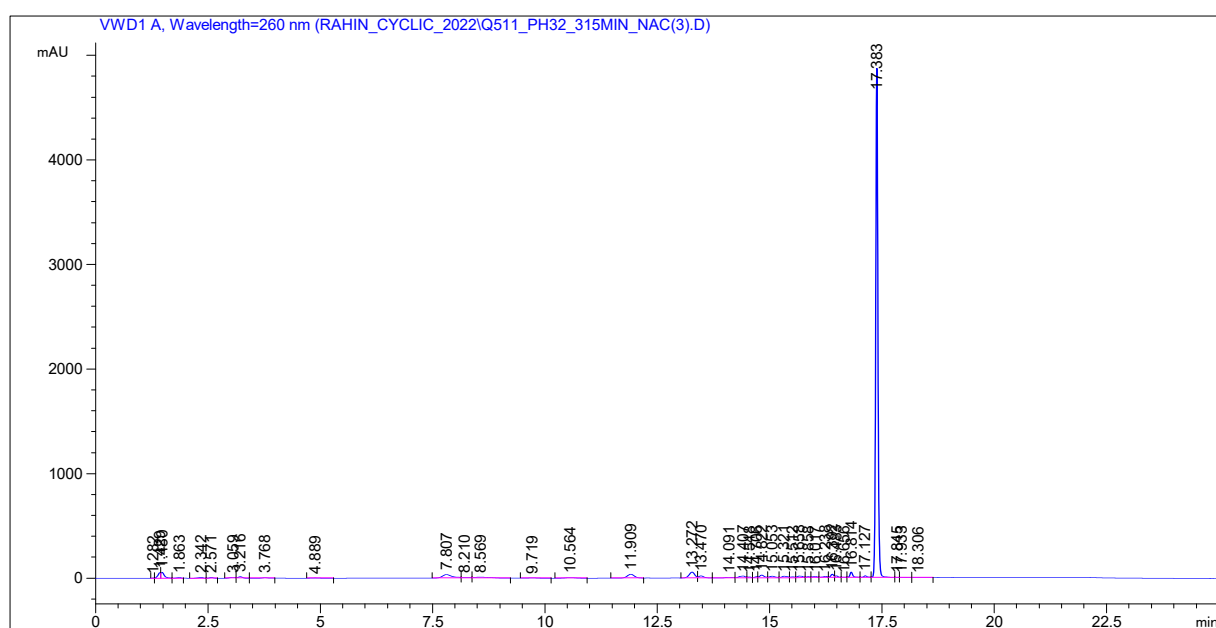

**Figure S19.** HPLC-UV chromatogram of pH 3.2/3.7 incubation (315 min time point) of **IIb** and NAC.

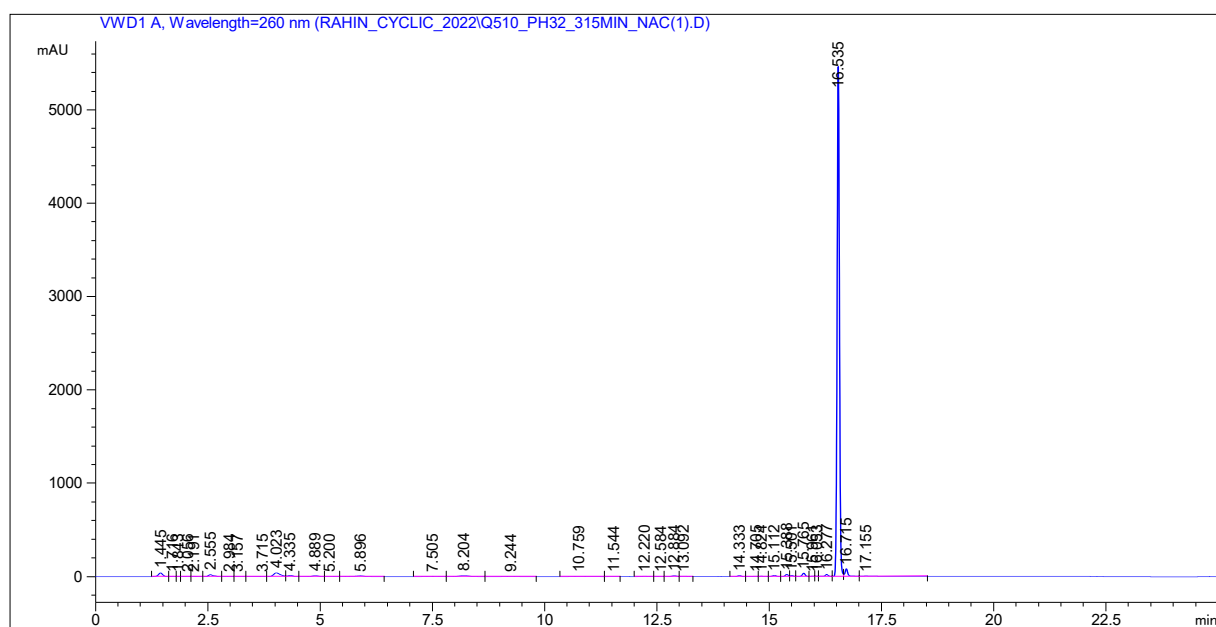

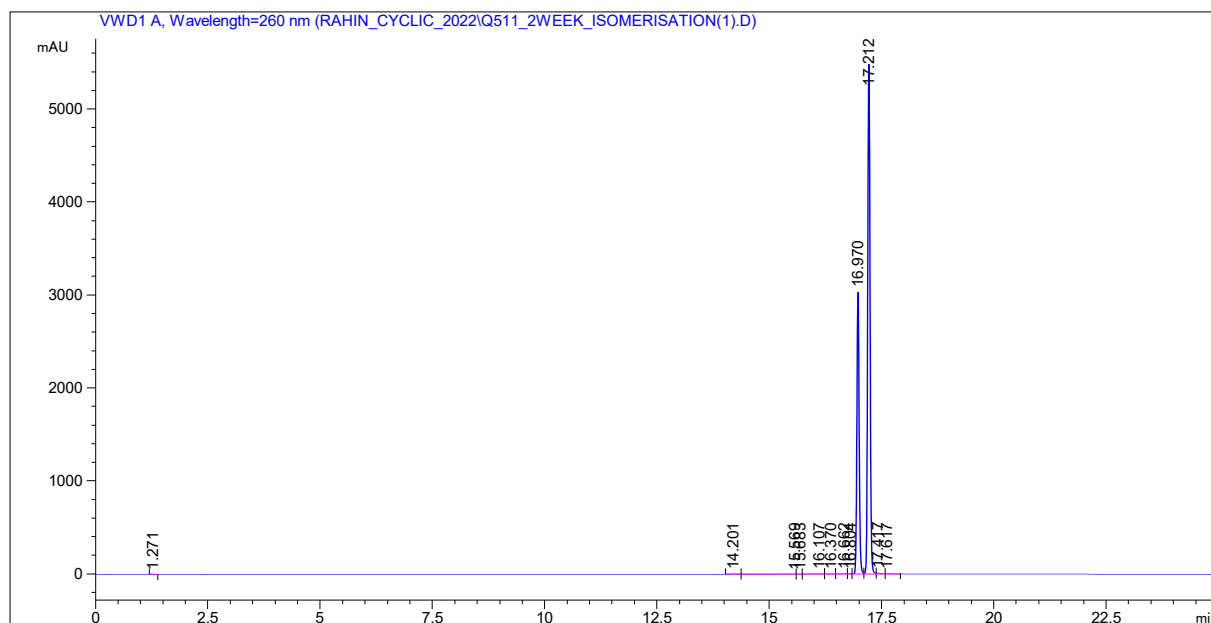

**Figure S21.** HPLC-UV spectrum of (*E*)( $t_R$  17.21 min)/(*Z*)( $t_R$  16.97 min) isomeric mixture of **IIb**.

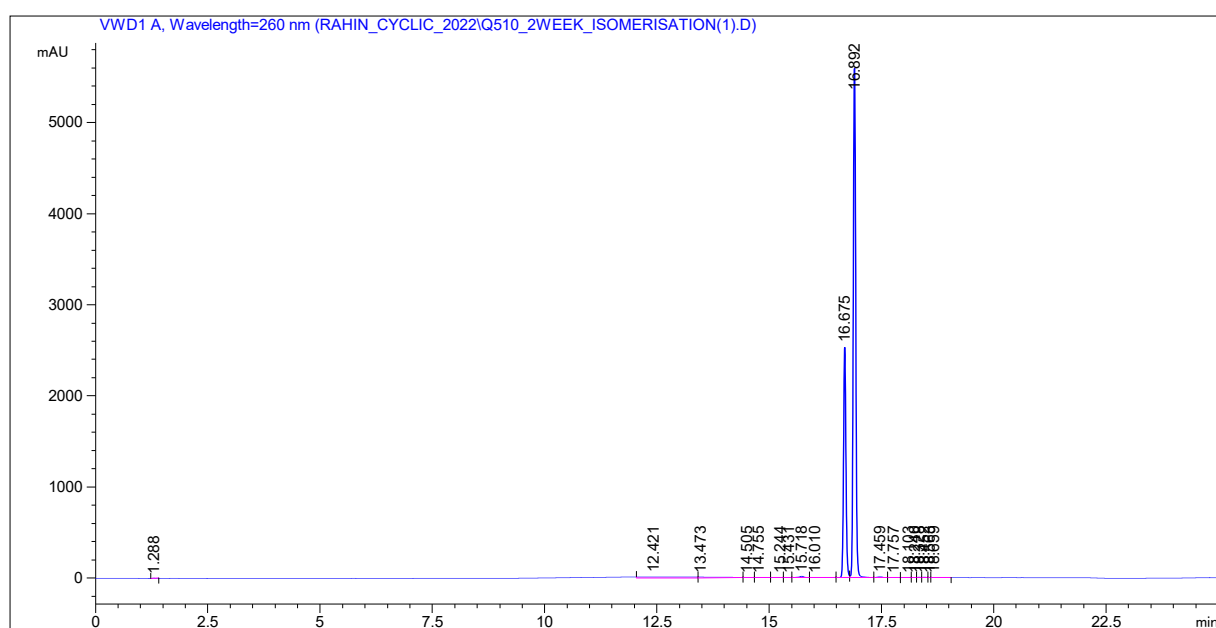

**Figure S22.** HPLC-UV-VIS spectrum of (*E*)( $t_R$  16.89 min)/(*Z*)( $t_R$  16.675 min) isomeric mixture of **IIc**.
